# Supplementary material for: Use of poly(methyl methacrylate) with an unsaturated chain end as a macroinitiator precursor in organocatalyzed living radical block polymerization
Source: Royal Society of Chemistry journal article supplement (doi:10.1039/c8py01066h), 2018-01-01
Supplement: c8py01066h1.pdf [file c8py01066h1.pdf]

## Electronic Supplementary Information (ESI)

# Use of Poly(methyl methacrylate) with Unsaturated Chain End as Macroinitiator Precursor in Organocatalyzed Living Radical Block Polymerization

*Jun Jie Chang,<sup>a</sup> Longqiang Xiao,<sup>a</sup> Chen-Gang Wang,<sup>a</sup>*

*Hiroshi Niino,<sup>b</sup> Shunsuke Chatani<sup>b</sup> and Atsushi Goto<sup>a\*</sup>*

<sup>a</sup>Division of Chemistry and Biological Chemistry, School of Physical and Mathematical Sciences,  
Nanyang Technological University, 21 Nanyang Link, 637371 Singapore

<sup>b</sup>Otake R&D Center, Mitsubishi Chemical Corporation, 20-1 Miyuki-cho, Otake, Hiroshima 739-0693,  
Japan

## 1. Experimental Section

**Materials.** Methyl methacrylate (MMA) (>99%, Mitsubishi Chemical Corporation (MCC), Japan), sodium 2-(methacryloyloxy)ethanesulfonate (>98%, MCC), 2,2'-azobis(2-methylpropionamide) dihydrochloride (V-50) (>98%, Wako Pure Chemical, Japan), 1,1,3,3-tetramethylbutylperoxy-2-ethylhexanoate (Perocta O) (>90%, NOF Corporation, Japan), cobalt (II) acetate tetrahydrate (>99%, Wako), diphenyl glyoxime (>98%, Tokyo Chemical Industry (TCI), Japan), boron trifluoride diethyl ether complex (>98%, TCI), potassium hydroxide (>85%, Wako), sodium sulfate (>99.5%, TCI), diethyl ether (>99.5%, TCI), butyl acrylate (BA) (>99%, TCI), tetrabutylammonium iodide (BNI)

(>98%, TCI), 2,2'-azobis(2-methylpropionitrile) (AIBN) (98%, Wako), iodine (I<sub>2</sub>) (>98%, TCI), 2-iodo-2-methylpropionitrile (CP-I) (>95%, TCI), hexane (>99%, International Scientific Pte Ltd., Singapore), and tetrahydrofuran (THF) (>99.5%, Kanto Chemical, Japan) were used as received.

**Synthesis of Dispersant for Dispersion Polymerization.** 61.6 g of 17% aqueous potassium oxide solution, 19.1 g of MMA, and 19.3 g of deionized water were charged into a reaction vessel equipped with a stirrer, condenser tube, and thermometer. The mixture was stirred at room temperature. After the confirmation of an exothermic peak, the mixture was stirred for additional 4 h. Subsequently, the mixture was cooled to room temperature to obtain an aqueous potassium methacrylate solution.

900 g of deionized water, 60 g of sodium 2-(methacryloyloxy) ethanesulfonate, 10 g of the aforementioned aqueous potassium methacrylate solution, and 12 g of MMA were placed in a reaction vessel equipped with a stirrer, condenser tube and thermometer. The mixture was heated to 50 °C under a nitrogen atmosphere. 0.08 g of V-50 was added into the reaction vessel and the mixture was further heated at 60 °C. Subsequently, MMA was continuously added dropwise for 75 min at a rate of 0.24 g/min using a syringe pump. After holding the reaction mixture at 60 °C for 6 h, the mixture was cooled to room temperature to obtain a dispersant as a transparent aqueous solution with a solid content of approximately 10%.

**Synthesis of Cobalt Complex for Dispersion Polymerization.** 2.00 g (8.03 mmol) of cobalt (II) acetate tetrahydrate, 3.86 g (16.1 mmol) of diphenyl glyoxime, and 100 mL of diethyl ether deoxygenated by nitrogen bubbling were placed in a reaction vessel equipped with a stirrer. The mixture was kept stirring for 2 h at room temperature under a nitrogen atmosphere.

Next, 20 mL of boron trifluoride diethyl ether complex was added, and the mixture was kept stirring for additional 6 hours. The resulting mixture was filtered, and the solid was washed with diethyl ether and then vacuum-dried for 12 h at 20 °C to obtain 5.02 g (7.93 mmol, yield: 99%) of cobalt complex as a brown solid.

**Dispersion Polymerization for Synthesis of PMMA-Y.** 145 g of deionized water, 0.1 g of sodium sulfate, and 0.26 g of the dispersant synthesized above were placed in a reaction vessel equipped with a stirrer, condenser tube, and thermometer, and the mixture was stirred to obtain a homogeneous aqueous solution. To this solution, 100 g of MMA, 0.005 g of cobalt complex, and 0.1 g of Perocta O were added to obtain an aqueous dispersion, which was subsequently heated to 80 °C under a nitrogen atmosphere. The temperature was held at 80 °C for 4 h and then heated to 92 °C and was held for additional 2 h. The aqueous dispersion was cooled to 40 °C and filtered with a filter cloth. The filtrate was washed with deionized water and dried for 16 h at 40 °C to obtain PMMA-Y as white beads ( $M_n = 3,900$ ).

**Measurement.** The GPC analysis was performed on a Shodex GPC-101 liquid chromatograph (Tokyo, Japan) equipped with two Shodex KF-804L mixed gel columns (300 × 8.0 mm; bead size = 7 μm; pore size = 20–200 Å). The eluent was tetrahydrofuran (THF) at a flow rate of 1.0 mL/min. Sample detection and quantification were conducted using a Shodex differential refractometer RI-101 calibrated with known concentrations of polymer in solvent. The monomer conversion was determined from the peak area. The column system was calibrated with standard polystyrenes and poly(methyl methacrylate)s (PMMA)s.

**NMR.** The NMR spectra were recorded on a Bruker (Germany) BBFO spectrometer (400 MHz) at ambient temperature.  $CDCl_3$  (Cambridge Isotope Laboratories, USA) was used as a solvent, and the chemical shift was calibrated using the residual undeuterated solvent or tetramethylsilane (TMS) as the internal standard.

**Gradient Polymer Elution Chromatography (GPEC).** The GPEC analysis was performed at 40°C on a HPLC alliance e2695 liquid chromatograph (Waters, Milford, USA) equipped with a TSKgel ODS-100V column (TOSOH, Tokyo, Japan) (150 × 4.6 mm; bead size = 5 μm). The eluent was a gradient solvent of acetonitrile/THF from 100/0 to 0/100 in 10 min at a flow rate of 1 mL/min. Sample detection was conducted using a PDA 2998 detector (Waters).

**MALDI-TOF-MS.** The matrix assisted laser desorption/ionization time-of-flight mass spectrometry (MALDI-TOF-MS) spectra were recorded on a JMS-S3000 SpiralTOF (JEOL, Japan) at an accelerating potential of 20 kV in the positive spiral mode. We prepared the polymer solutions (PMMA–Y: 10 g/L in THF and organocatalyzed LRP reaction mixture: 10 g/L in THF), matrix solution (DCTB: 60 g/L in THF), and cationization agent solution (NaTFA: 10 g/L in THF). The MALDI-TOF-MS samples were prepared by the dried droplet method.<sup>1</sup> The polymer solutions (in THF), NaTFA solution (in THF) and the DCTB solution (in THF) were mixed in a ratio of 1/1/2 (v/v/v). The mixed solution was deposited on the target plate spot and dried in the air at room temperature.

**General Procedure for Polymerization.** In a typical run (Table 1 (entry 1)), a mixture of BA (2.00 g), PMMA-Y (0.304 g), CP-I (0.0152 g), and BNI (0.231 g) was heated in a Schlenk flask at 110 °C under an argon atmosphere with magnetic stirring. After a prescribed time  $t$ , an aliquot (0.1 mL) of the solution was taken out by a syringe, quenched to room temperature, diluted by THF to a known concentration, and analyzed by GPC.

## 2. MALDI-TOF-MS Data

(a) PMMA-Y

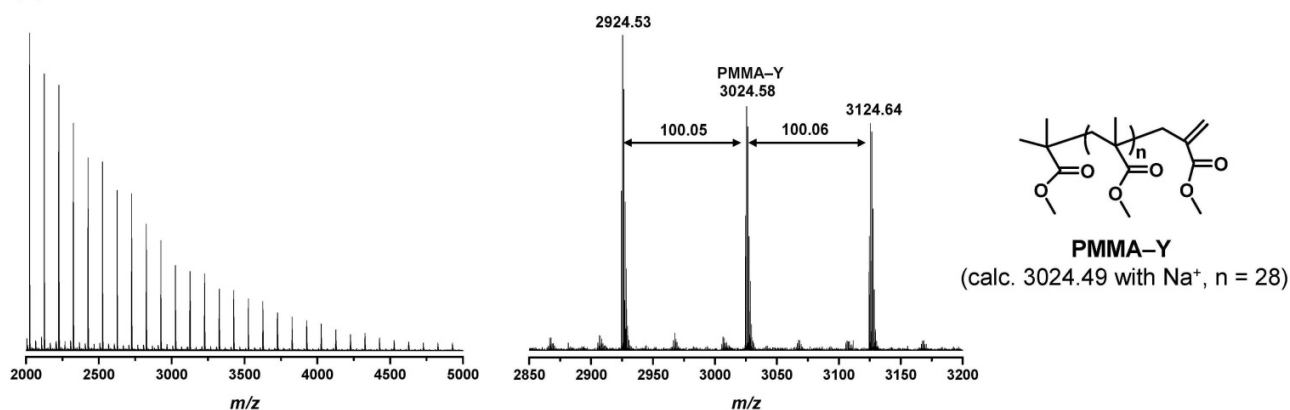

(b) Organocatalyzed LRP (Table 1 (entry 1) at 8 h)

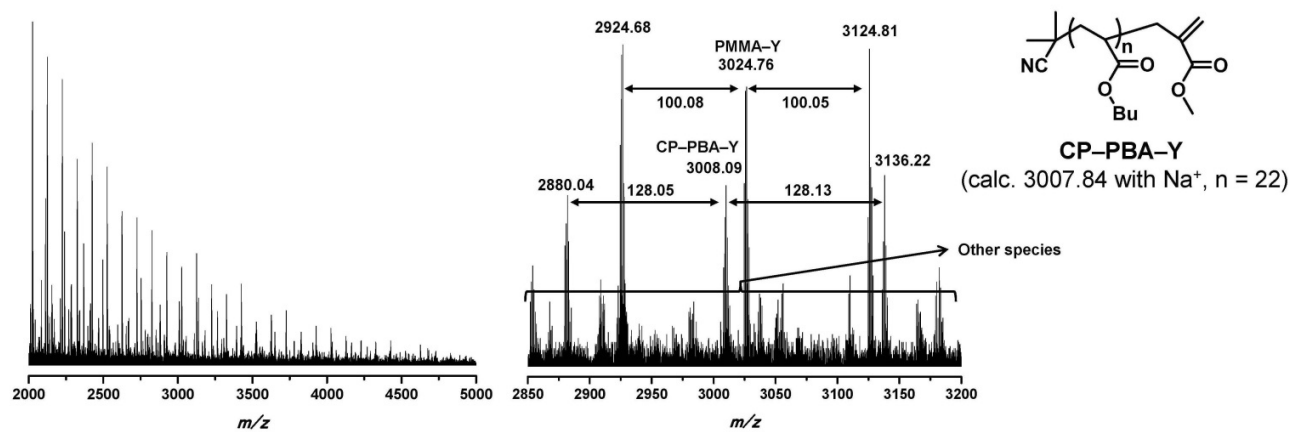

**Fig. S1.** MALDI-TOF-MS spectra of (a) PMMA-Y and (b) the polymer obtained in the organocatalyzed LRP (Table 1 (entry 1) at 8 h).

## Reference

- (1) K. Kim, A. Hasneen, H. Paik and T. Chang, *Polymer*, 2013, **54**, 6133–6139.
